# Supplementary material for: Plasticizing Li single-ion conductors with low-volatility siloxane copolymers and oligomers containing ethylene oxide and cyclic carbonates
Source: Royal Society of Chemistry journal article supplement (doi:10.1039/c5ta06042g), 2015-01-01
Supplement: c5ta06042g1.pdf [file c5ta06042g1.pdf]

Supplemental Information

**Plasticizing Polysiloxane Tetraphenyl Borate – Li Single-ion Conductors  
with Non-Volatile Copolymers and Oligomers Containing Ethylene Oxide and Cyclic  
Carbonates**

*Siwei Liang,<sup>1,2</sup> Quan Chen,<sup>1,3†</sup> U Hyeok Choi,<sup>1</sup> Joshua Bartels,<sup>1</sup> Nanqi Bao,<sup>1</sup> James Runt,<sup>1</sup> and  
Ralph H. Colby<sup>\*1</sup>*

1. Materials Science and Engineering,  
The Pennsylvania State University, University Park, PA 16802
2. Joint Center for Artificial Photosynthesis, Lawrence Berkeley National Laboratory,  
One Cyclotron Road, Berkeley, CA 94720
3. State Key Laboratory of Polymer Physics and Chemistry, Changchun Institute of Applied Chemistry,  
Chinese Academy of Sciences, Changchun 130022, People's Republic of China
4. Functional Composites Department, Korea Institute of Materials Science, Changwon, 642-831, Korea

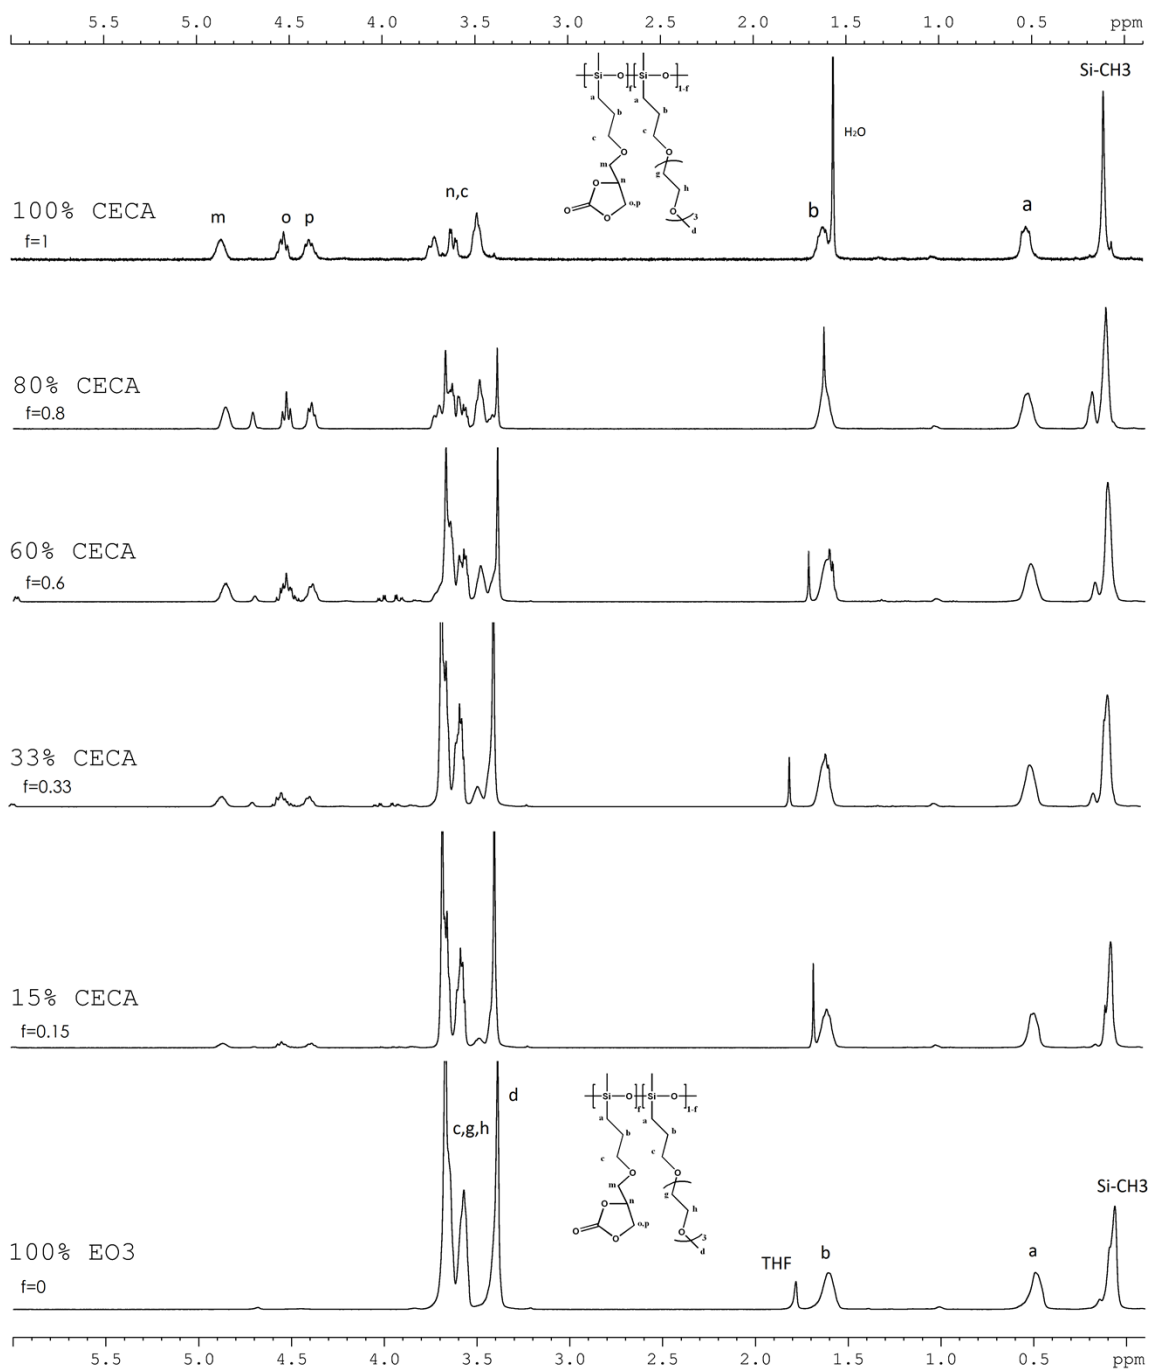

**Figure S1.** <sup>1</sup>H NMR of copolymer plasticizers.

**Table S1.** Compositions and molecular weights of copolymer plasticizers.

|         | CPP0  | CPP19 | CPP31 | CPP57 | CPP80 | CPP100 |
|---------|-------|-------|-------|-------|-------|--------|
| $f^a$   | 0     | 18.4  | 29.8  | 56.5  | 79.6  | 100    |
| $f^b$   | 0     | 19.5  | 32.4  | 58.8  | 79.9  | 100    |
| $M_n^c$ | 12700 | 12400 | 12200 | 11800 | 11400 | 11100  |

- Calculated by the method using the integrated area of peaks a and d:  
 $f = 2(a/2 - d/3)/a$  .
- Calculated by the method using the integrated area of peaks n and d:  $f = o/(o + d/3)$  .
- Number-average molecular weight calculated from  $f$ , assuming number-average DP = 52 as suggested from  $^{29}\text{Si}$  NMR of the polymethylhydrosiloxane in Figure S1.

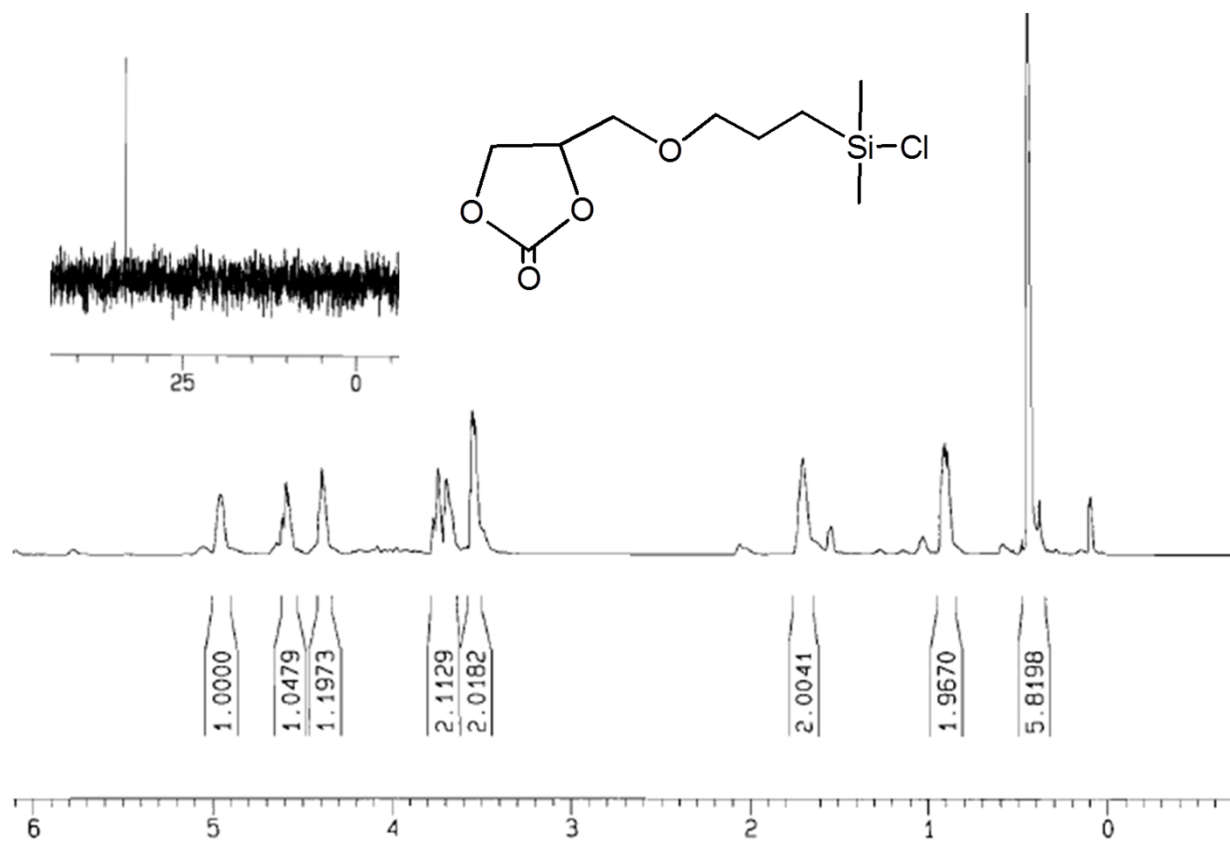

**Figure S2.** <sup>1</sup>H NMR of 4-((3-(chlorodimethylsilyl)propoxy)methyl)-1,3-dioxolan-2-one. Inset is <sup>29</sup>Si NMR with a single peak at 33 ppm relative to TMS.

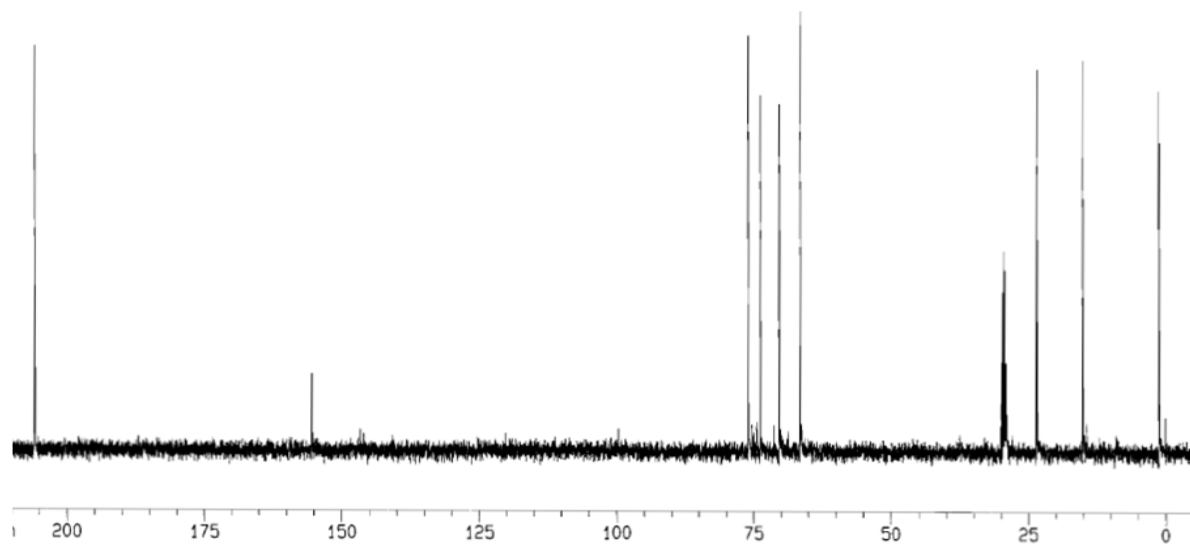

Fig

ure S3. <sup>13</sup>C NMR of 4-((3-(chlorodimethylsilyl)propoxy)methyl)-1,3-dioxolan-2-one.

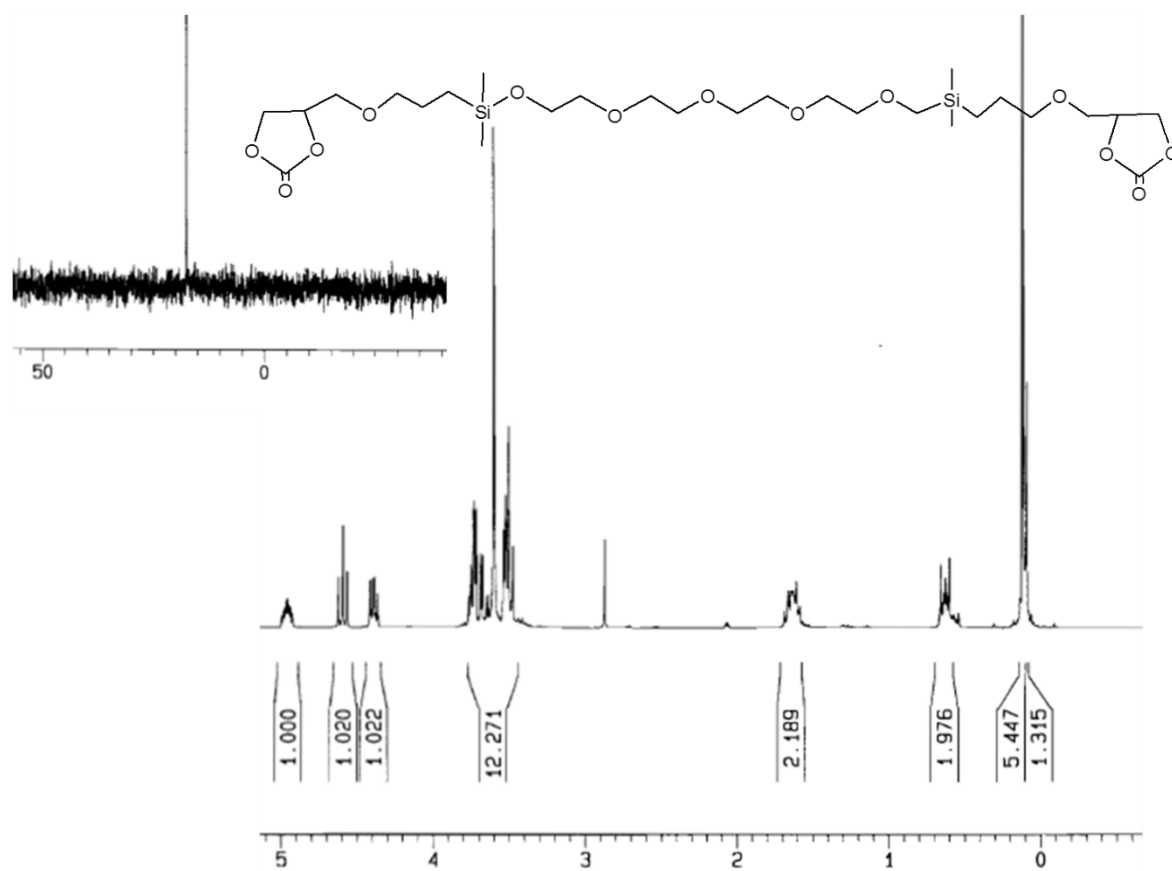

**Figure S4.**  $^1\text{H}$  NMR of oligomeric plasticizer OP-62. Inset is  $^{29}\text{Si}$  NMR with a peak at 18 ppm relative to TMS.

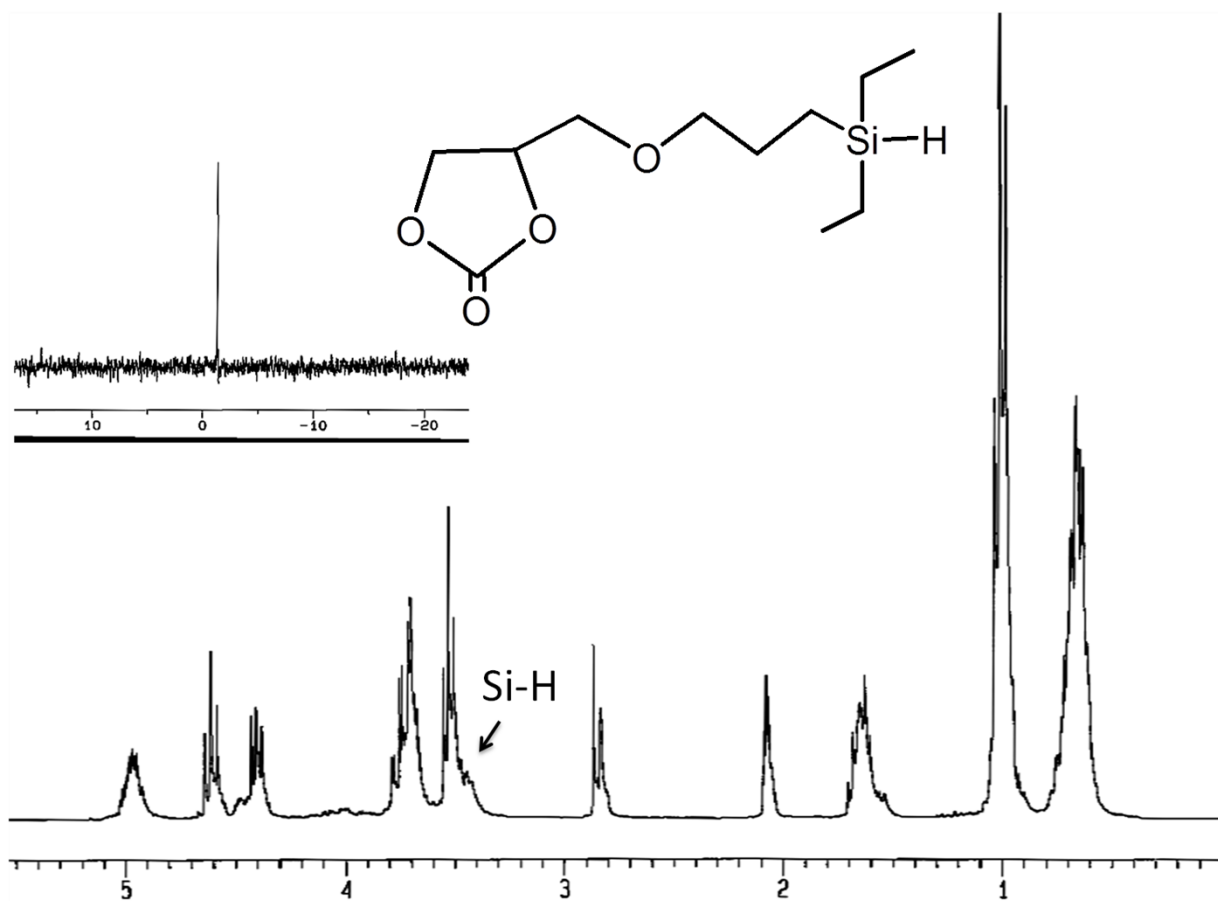

**Figure S5.**  $^1\text{H}$  NMR of 4-((3-(diethylsilyl)propoxy)methyl)-1,3-dioxolan-2-one. Inset is  $^{29}\text{Si}$  NMR with a peak at -1.8 ppm relative to TMS.

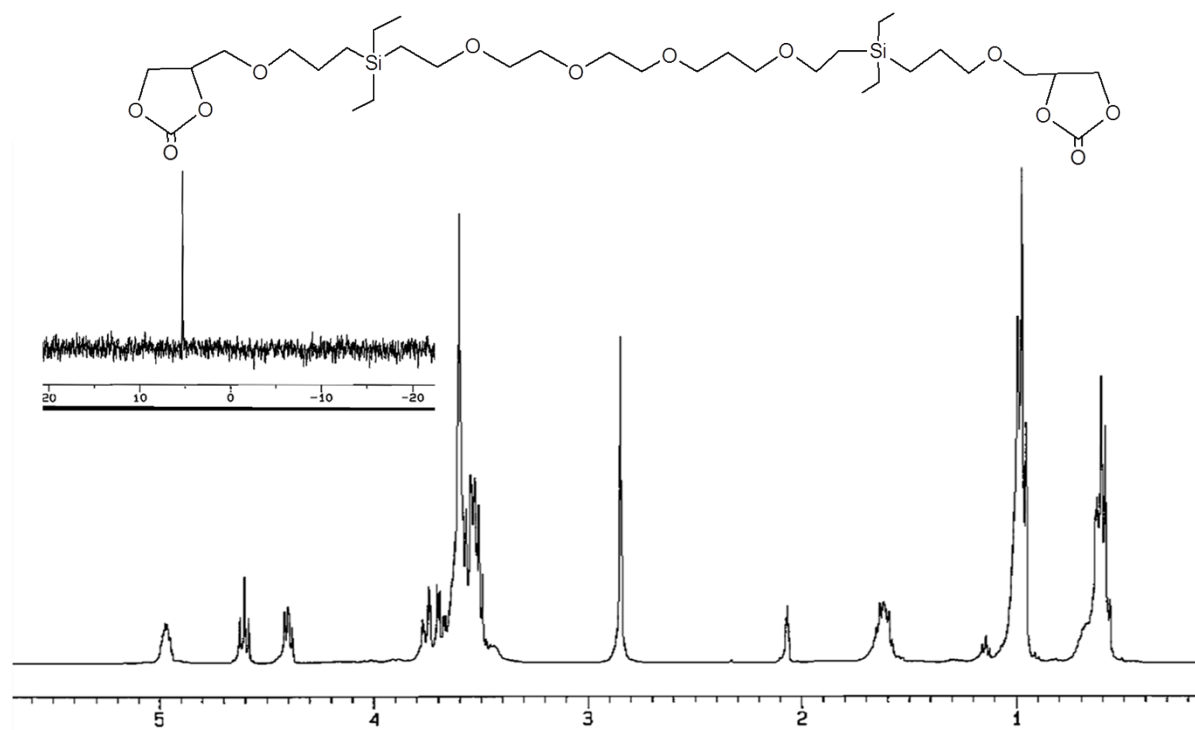

**Figure S6.** <sup>1</sup>H NMR of oligomeric plasticizer OP-73. Inset is <sup>29</sup>Si NMR with a peak at 5 PPM relative to TMS.

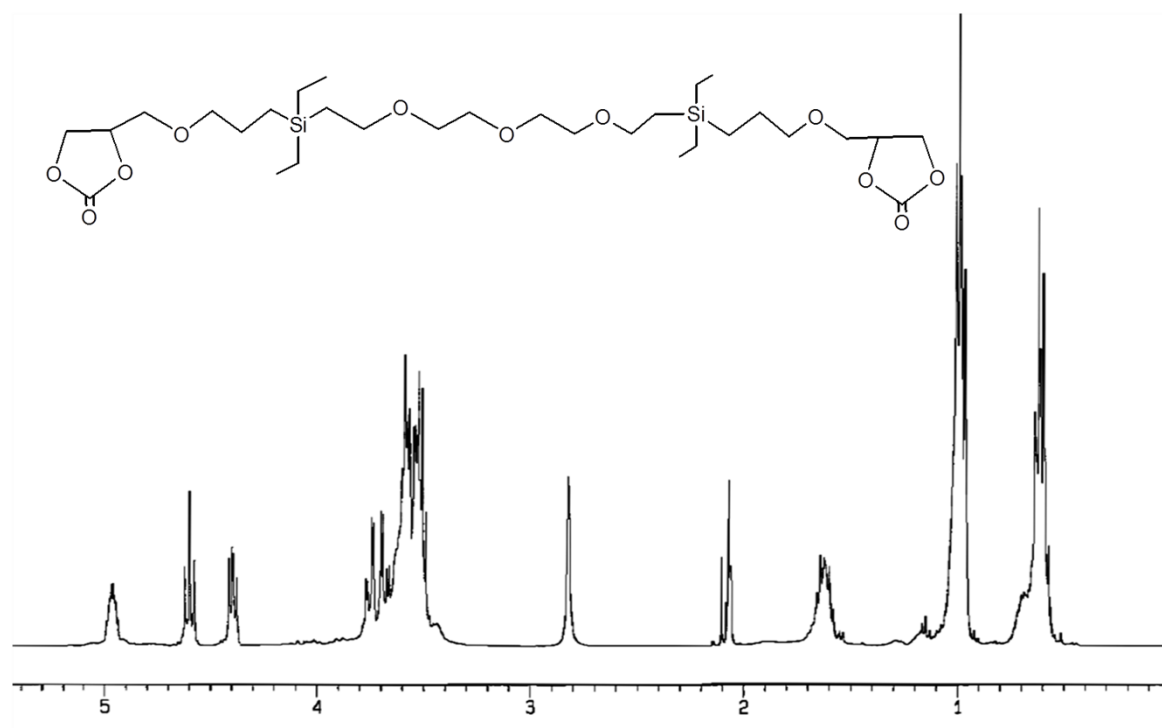

**Figure S7.** <sup>1</sup>H NMR of oligomeric plasticizer OP-67.

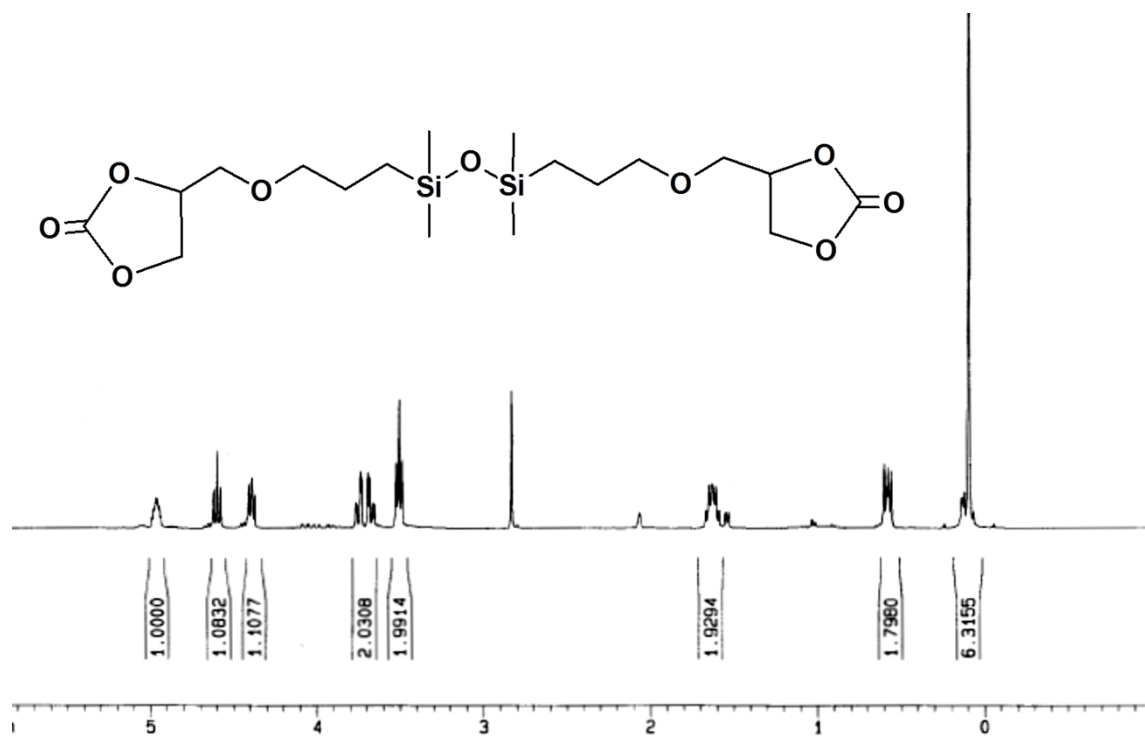

**Figure S8.** <sup>1</sup>H NMR of oligomeric plasticizer OP-89.

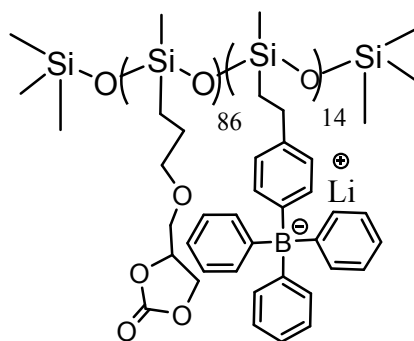

**Figure S9.** Structure of the 14 mol% borate random copolymer ionomer.
